# Supplementary material
Source: Elsevier journal article supplement (https://www.sciencedirect.com/science/article/pii/S1885585714004617)
Supplement: mmc1 [file S1885585714004617:mmc1.pdf]

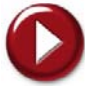

## Supplementary material

---

# Greater Adherence to a Mediterranean Dietary Pattern Is Associated With Improved Plasma Lipid profile: the Aragon Health Workers Study Cohort

José L. Peñalvo <sup>a,\*</sup>, Belén Oliva <sup>a</sup>, Mercedes Sotos-Prieto <sup>a,b</sup>, Irina Uzhova <sup>a</sup>,  
Belén Moreno-Franco <sup>c</sup>, Montserrat León-Latre <sup>c</sup> and José María Ordovás <sup>a,d</sup>

<sup>a</sup>*Área de Epidemiología y Genética de Poblaciones, Fundación Centro Nacional de Investigaciones Cardiovasculares (CNIC), Madrid, Spain*

<sup>b</sup>*Department of Nutrition, Harvard School of Public Health, Boston, Massachusetts, United States*

<sup>c</sup>*Unidad de Prevención Cardiovascular, Instituto Aragonés de Ciencias de la Salud (I+CS), Zaragoza, Spain*

<sup>d</sup>*Nutrition and Genomics Laboratory, Jean Mayer US Department of Agriculture Human Nutrition Research Center on Aging at Tufts University, Boston, Massachusetts, United States*

---

**Supplementary Material Table 1: Food Items Classification into the Main Food Groups**

| Food groups                                     | Food items                                                                                                                                                |
|-------------------------------------------------|-----------------------------------------------------------------------------------------------------------------------------------------------------------|
| Vegetables                                      | Green beans, lettuce, tomato, carrots, eggplant, peppers, asparagus, gazpacho-soup, salad, onions, garlic, parsley, mushrooms, fresh peas, cabbage, chard |
| Fruit                                           | Orange, apple, strawberry, peach, cherry, watermelon, melon, kiwi, grapes, banana, fresh juice, dried fruits, other juices                                |
| Cereal-derived<br>(including whole grain)       | Bread, breakfast cereal, pasta, rice, whole grain cookies                                                                                                 |
| Pulses                                          | Lentils, chickpeas, beans                                                                                                                                 |
| Nuts                                            | Walnuts, hazelnuts, almonds                                                                                                                               |
| Fish                                            | White- and blue-fish, seafood                                                                                                                             |
| White meat                                      | Chicken, rabbit, low-fat ham                                                                                                                              |
| Red meat and eggs                               | Beef, pork, lamb, liver, pat , cured ham, minced meat                                                                                                     |
| Dairy                                           | Milk, yogurt, cream, milkshakes, condensed milk, butter, cheese                                                                                           |
| Low-fat dairy                                   | Skimmed milk, skimmed yogurt, low fat cheese                                                                                                              |
| Pre-made, frozen foods, fast food and dressings | French fries, chips and snacks, mayonnaise, mustard, ketchup                                                                                              |
| Sweets                                          | Cookies, chocolate, cakes, doughnut, fried dough ( <i>churro</i> ) muffins, almond paste ( <i>turr n</i> )                                                |
| Olive oil                                       | Extra-virgin, virgin, refined, olives                                                                                                                     |
| Vegetable oils                                  | Sunflower, corn, margarine                                                                                                                                |
| Coffee and tea                                  | Coffee, tea, decaf coffee                                                                                                                                 |
| Soda                                            | Any flavor soda including diet soda and sweetened juices                                                                                                  |
| Beer and wine                                   | Red wine, ros  wine, white wine, beer                                                                                                                     |
